# Supplementary material
Source: MDPI journal article supplement (https://www.mdpi.com/2624-8611/4/2/16)
Supplement: s1 [file s1]

## Supplement: Differentiated statistical values

### SKT

#### **Total score**

„dementia“ and „MCI“,  $p < .001$  (Mdiff=2.94, 95%-CI [1.34,4.54])

„dementia“ and „depression“,  $p < .001$  (Mdiff=5.56, 95%-CI [3.56,7.56])

„MCI“ and „depression“,  $p = .012$  (Mdiff=2.63, 95%-CI [.39,4.86])

„MCI“ and „cognitively impaired AND depression“,  $p < .001$  (Mdiff=-4.03, 95%-CI [-5.99,-2.07])

„depression“ and „cognitively impaired AND depression“,  $p < .001$  (Mdiff=-6.65, 95%-CI [-8.95,-4.36]).

„dementia“ and „cognitively impaired AND depression“,  $p = .51$  (Mdiff=-1.09, 95%-CI [-2.77,0.59])

#### **Memory subscore**

„dementia“ and „MCI“,  $p = .006$  (Mdiff=1.02, 95%-CI [.22,1.82])

„dementia“ and „depression“,  $p < .001$  (Mdiff=2.79, 95%-CI [1.92,3.65])

„MCI“ and „depression“,  $p < .001$  (Mdiff=1.77, 95%-CI [.76,2.78])

„depression“ and „cognitively impaired AND depression“,  $p < .001$  (Mdiff=-2.39, 95%-CI [-3.48,-1.31]).

„MCI“ and „cognitively impaired AND depression“,  $p = .399$  (Mdiff=-.62, 95%-CI [-1.66,.41])

„dementia“ and „cognitively impaired AND depression“,  $p = .659$  (Mdiff=.39, 95%-CI [-.50,1.29])

#### **Attention subscore**

„dementia“ and „MCI“,  $p = .001$  (Mdiff=2.02, 95%-CI [.72,3.31])

„dementia“ and „depression“,  $p = .002$  (Mdiff=2.84, 95%-CI [.91,4.78])

„depression“ and „cognitively impaired AND depression“,  $p < .001$  (Mdiff=-4.26, 95%-CI [-6.34,-2.18]).

„MCI“ and „cognitively impaired AND depression“,  $p < .001$  (Mdiff=-3.44, 95%-CI [-4.59,-1.92])

„dementia“ and „cognitively impaired AND depression“,  $p = .019$  (Mdiff=-1.42, 95%-CI [-2.67,-.17])

„MCI“ and „depression“,  $p=.731$  (Mdiff=.83, 95%-CI [-1.28,2.94]).

## RBMT

### ***story immediate recall subtest***

„dementia“ and „MCI“,  $p<.001$  (Mdiff=-1.778, 95%-CI [-2.679,-.877])

„dementia“ and „depression“,  $p<.001$  (Mdiff=-4.805, 95%-CI [-6.168,-3.441])

„MCI“ and „depression“,  $p<.001$  (Mdiff=-3.027, 95%-CI [-4.544,-1.510])

„depression“ and „cognitively impaired AND depression“,  $p<.001$  (Mdiff=4.353, 95%-CI [2.856,5.850]).

„MCI“ and „cognitively impaired AND depression“,  $p=.012$  (Mdiff=1.326, 95%-CI [.221,2.432])

„dementia“ and „cognitively impaired AND depression“,  $p=.524$  (Mdiff=-.452, 95%-CI [-1.318,.415])

### ***story delayed recall subtest***

„dementia“ and „MCI“,  $p<.001$  (Mdiff=-2.333, 95%-CI [-3.257,-1.410])

„dementia“ and „depression“,  $p<.001$  (Mdiff=-5.024, 95%-CI [-6.177,-3.871])

„MCI“ and „depression“,  $p<.001$  (Mdiff=-2.690, 95%-CI [-3.983,-1.398])

„depression“ and „cognitively impaired AND depression“,  $p<.001$  (Mdiff=4.342, 95%-CI [3.016,5.667]).

„MCI“ and „cognitively impaired AND depression“,  $p=.001$  (Mdiff=1.651, 95%-CI [.519,2.783])

„dementia“ and „cognitively impaired AND depression“,  $p=.375$  (Mdiff=-.682, 95%-CI [-1.652,.287])

## NAI maze test

„dementia“ and „MCI“,  $p<.001$  (Mdiff=37.71, 95%-CI [21.55,53.86])

„dementia“ and „depression“,  $p<.001$  (Mdiff=36.57, 95%-CI [18.60,54.54])

„depression“ and „cognitively impaired AND depression“,  $p=.001$  (Mdiff=-36.65, 95%-CI [-61.43,-11.87])

„MCI“ and „cognitively impaired AND depression“,  $p<.001$  (Mdiff=-37.79, 95%-CI [-61.37,-14.21])

„MCI“ and „depression“,  $p=.996$  (Mdiff=-1.14, 95%-CI [-14.30,12.03])

„dementia“ and „cognitively impaired AND depression“,  $p=1.000$  (Mdiff=-.08, 95%-CI [-26.58,26.41])

#### WAIS similarities

„dementia“ and „MCI“,  $p<.001$  (Mdiff=-7.07, 95%-CI [-9.79,-4.36])

„dementia“ and „depression“,  $p<.001$  (Mdiff=-8.90, 95%-CI [-11.59,-6.20])

„depression“ and „cognitively impaired AND depression“,  $p<.001$  (Mdiff=9.64, 95%-CI [6.22,13.06])

„MCI“ and „cognitively impaired AND depression“,  $p<.001$  (Mdiff=7.82, 95%-CI [4.38,11.26])

„MCI“ and „depression“,  $p=.358$  (Mdiff=-1.83, 95%-CI [-4.73,1.08])

„dementia“ and „cognitively impaired AND depression“,  $p=.934$  (Mdiff=.74, 95%-CI [-2.53,4.01])
